# Supplementary material for: Efficacy of Cognitive Behavior Therapy in Reducing Depression among Patients with Coronary Heart Disease: An Updated Systematic Review and Meta-Analysis of RCTs
Source: MDPI journal article supplement (doi:10.3390/healthcare11070943), 2023-03-24

## SUPPLEMENTARY FILES

**Table S1.** Characteristics of Selected Studies

|   | First Author; Year; Country; Study Design                        | Population                                                                                                                                                                                                                                                                  | Sample                                                     | Male (%)                              | Age (y)                                                  | Instruments | Intervention                                                                                                                                | Comparison                                                                                                   | Outcomes (Depression)                                                                                                                                                                                                                                                                                                                                                                    | Appraisal Results |
|---|------------------------------------------------------------------|-----------------------------------------------------------------------------------------------------------------------------------------------------------------------------------------------------------------------------------------------------------------------------|------------------------------------------------------------|---------------------------------------|----------------------------------------------------------|-------------|---------------------------------------------------------------------------------------------------------------------------------------------|--------------------------------------------------------------------------------------------------------------|------------------------------------------------------------------------------------------------------------------------------------------------------------------------------------------------------------------------------------------------------------------------------------------------------------------------------------------------------------------------------------------|-------------------|
| 1 | Turner 2013<br>New Zealand<br>A single-blind RCTs                | Participants aged $\geq 18$ years, diagnosed with CHD for at least two months (Coronary Syndrome (ACS); undergoing PCI; undergoing Coronary Artery Bypass Graft (CABG) and/or a definite diagnosis of a heart condition, and experiencing depression as measured by BDI II. | 57 patients.<br><br>Intervention n=25<br><br>Control n=32  | Intervention: 76%<br><br>Control: 72% | Intervention: 61 $\pm$ 11<br><br>Control: 62 $\pm$ 9     | BDI-II      | Intervention delivered by psychologist, 6 session (1,5h/session), a face to face group therapy other therapy outside study were allowed.    | Intervention: Brief intervention and CBT<br><br>Control: Brief intervention                                  | Meanscore:<br><br>Intervention group:<br>Baseline: 25.7(7.33)<br>2 mo: 20.5(8.4)<br>6 mo: 19.8(10.3)<br>12 mo: 17.4(10.3)<br><br>Brief session (CG):<br>Baseline: 27.2(8.32)<br>2 mo: 19.6(9.3)<br>6 mo: 17.8(9.5)<br>12 mo: 16.6(10.5)<br><br>There is no significant difference in all time points between the control and intervention groups (baseline, 2, 6, and 12 months) $p>.05$ | 92%               |
| 2 | Davidson 2013<br>USA<br>Multi-center randomized controlled trial | Participants were patients with elevated depressive symptoms; 2 to 6 months after an ACS.                                                                                                                                                                                   | 150 patients.<br><br>Intervention n=73<br><br>Control n=77 | Intervention 59%<br><br>Control 57%   | Intervention 59.2 $\pm$ 9.7<br><br>Control 60 $\pm$ 11.1 | BDI-II      | A face to face individual and combine therapy, Intervention delivered by therapist, psychiatry, psychology supervisor and registered nurse. | Intervention: PST, medication (sertraline hydrochloride, citalopram hydrobromide)<br><br>Control: Usual care | Intervention group<br>6 mo: 24(47.1)<br>$\Delta$ -10.1 (95%, CI -12 – 8.1)<br><br>Usual Group (U.C.)<br>6 mo: 16(27.6)<br>$\Delta$ -6.6 (95%, CI -8.5 – (-4.8)<br><br>The active treatment group had a greater reduction in BDI-scores (differential change between groups -3.5 (95% CI -6.1 to -0.7; $p=.01$ ).                                                                         | 100%              |
| 3 | Doering 2013<br>RCTs<br>USA                                      | Patients with depressive symptoms. Age > 30 y, one month                                                                                                                                                                                                                    | 81 patients post cardiac surgery                           | Intervention n=80%                    | Intervention n=63.4 $\pm$ 8.4                            | BDI-II      | intervention delivered by advanced practice nurses, 8 session (50-                                                                          | Intervention: CBT<br><br>Control:                                                                            | The intervention was effective in improving depression particularly for those who received early CBT ( $\beta=0.79$ [95% CI 0.10 – 1.47]).                                                                                                                                                                                                                                               | 85%               |

| First Author; Year; Country; Study Design | Population                                             | Sample                                                             | Male (%)                                                  | Age (y)                                     | Instruments                                         | Intervention                                         | Comparison                                                                                        | Outcomes (Depression)                                                                                                                           | Appraisal Results                                                                                                                                                                                                                                                                                                                                                                              |     |
|-------------------------------------------|--------------------------------------------------------|--------------------------------------------------------------------|-----------------------------------------------------------|---------------------------------------------|-----------------------------------------------------|------------------------------------------------------|---------------------------------------------------------------------------------------------------|-------------------------------------------------------------------------------------------------------------------------------------------------|------------------------------------------------------------------------------------------------------------------------------------------------------------------------------------------------------------------------------------------------------------------------------------------------------------------------------------------------------------------------------------------------|-----|
|                                           | after cardiac surgery procedures.                      | (CABG, AVR, MVR).<br><br>Intervention n=45.<br><br>Control: n=36.  | Control n=55,6%                                           | Control n=63.9±11.4                         |                                                     | 60 min /session) , A face to face individual therapy | Usual care. After completion of U.C. period, a control group were offered later CBT+UC (waitlist) | Intervention group:<br>8 weeks (2 mo): Δ -6.91(9.9)<br><br>U.C.:<br>8 weeks (2 mo): Δ 2.03(9.8)<br><br>Late CBT<br>8 weeks (2 mo): Δ -5.40(7.2) |                                                                                                                                                                                                                                                                                                                                                                                                |     |
| 4                                         | O'Neil 2014<br>Australia<br>A two-arm multicenter RCTs | Patients ACS with depression who admitted to one of six hospitals. | 121 patients<br><br>Intervention n=61<br><br>Control n=60 | Intervention n=73.8%<br><br>Control n=76.7% | Intervention=6<br>1.0±10.2<br><br>Control=58.9±10.7 | PHQ9 and CDS                                         | intervention delivered by psychologist, 10 session, telephone based individual therapy            | Intervention: CBT<br>Control: Usual care                                                                                                        | Intervention group:<br>PHQ9: Baseline: 9(5.4)<br>6 mo: 6.1(5.5)<br>Δ -3.00(4.30)<br>U.C.:<br>PHQ9: Baseline: 9.4(5.2)<br>6 mo: 8.11(5.8)<br>Δ -1.27(5.24)                                                                                                                                                                                                                                      | 92% |
| 5                                         | O'Neil 2015<br>Australia<br>A two-arm multicenter RCTs | Patients ACS with depression who admitted to one of six hospitals. | 121 patients<br><br>Intervention n=61<br><br>Control n=60 | Intervention n=73.8%<br><br>Control n=76.7% | Intervention=6<br>1.0±10.2<br><br>Control=58.9±10.7 | PHQ9 and CDS                                         | intervention delivered by psychologist, 10 session, a telephone based individual therapy          | Intervention: CBT<br>Control: Usual care                                                                                                        | MDD patients<br>Intervention group (n=28)<br>PHQ9: 12 mo: 6.5(4.9-8.0)<br><br>UC (n=28):<br>PHQ9: 12 mo: 9.3(7.7-10.9)<br><br>No MDD patients<br>Intervention group<br>PHQ9: 12 mo: 6.2(4.8-7.5)<br><br>UC:<br>PHQ9: 12 mo: 5.2(3.9-6.6)<br><br>Overall, after 12 months<br>PHQ9: Intervention group had mean score 6.5; 95% CI: 4.9–8.0 versus Control group: 9.3; 95% CI: 7.7–10.9, p=0.012. | 92% |

|   | First Author; Year; Country; Study Design | Population                                                              | Sample                                               | Male (%)                                | Age (y)                                         | Instruments                                                          | Intervention                                                                                                                                                        | Comparison                                | Outcomes (Depression)                                                                                                                                                                                                                                                                 | Appraisal Results |
|---|-------------------------------------------|-------------------------------------------------------------------------|------------------------------------------------------|-----------------------------------------|-------------------------------------------------|----------------------------------------------------------------------|---------------------------------------------------------------------------------------------------------------------------------------------------------------------|-------------------------------------------|---------------------------------------------------------------------------------------------------------------------------------------------------------------------------------------------------------------------------------------------------------------------------------------|-------------------|
| 6 | Fernandes 2017 Portugal RCTs              | Patients with ACS in a central hospital.                                | 121 patients.<br>Intervention n=65<br>Control n=56   | Intervention n=68.8%<br>Control n=71.4% | Intervention =61.77±12.1<br>Control =66.11±12.6 | HADS                                                                 | intervention delivered by psychologist and cardiologist , 3 session (1h15min/session, a face to face group and combination therapy, added health education for CHD. | Intervention: CBT<br>Control: Usual care  | Intervention group<br>Baseline: 12.8(4.05)<br>1 mo: 5.16(0.35)<br><br>U.C.:<br>Baseline: 9.61(4.49)<br>1 mo: 12.94(0.38)                                                                                                                                                              | 72%               |
| 7 | Norlund 2017 Sweden RCTs                  | Patients discharge after an Miocardial Infarction (MI), CABG and PCI.   | 362 patients.<br>Intervention n=192<br>Control n=170 | Interventionn= 77.6%<br>Control n=75.3% | Intervention=6 2.0±7.94<br>Control=61.0± 8.28   | The Depressive Mood Scale and the Every day Life Stress Scale (ELSS) | intervention delivered by psychologist and nurse , 20 session (2 h/session), a face to face group therapy.                                                          | Intervention: CBT<br>Control: Usual care  | Depression improved over time but there were no significant differences between groups.<br>No information regarding post-test Mean(S.D.) between I.G. and U.C.                                                                                                                        | 100%              |
| 8 | Norlund 2018 Sweden Multicenter RCTs      | Patients with recent MI and were having depression or anxiety simptoms. | 239 patients<br>Intervention n=117<br>Control n=122  | Intervention n=62.4%<br>Control n=70.5% | Intervention=5 8.4±9<br>Control =60.8±7.8       | HADS                                                                 | Intervention delivered by psychologist, an internet and telephone-based therapy.                                                                                    | Intervention: iCBT<br>Control: Usual care | Intervention group<br>Baseline: 9.9(2.2)<br>14 weeks/±3 mo: 6.6(3.3)<br><br>UC:<br>Baseline: 10.3(2.5)<br>14 weeks/±3 mo: 8.0(3.8)<br><br>There was a reduction in HADS scores over time but no difference between the groups at follow-up (beta=-0.47, 95% CI -1.95 to 1.00, P=.53). | 92%               |

| First Author; Year; Country; Study Design       | Population                                                                                                                 | Sample                                                            | Male (%)                                          | Age (y)                                                     | Instruments                                       | Intervention                                                                                                                                                                                                      | Comparison                                            | Outcomes (Depression)                                                                                                                                                                                                                                                                                                                                           | Appraisal Results |
|-------------------------------------------------|----------------------------------------------------------------------------------------------------------------------------|-------------------------------------------------------------------|---------------------------------------------------|-------------------------------------------------------------|---------------------------------------------------|-------------------------------------------------------------------------------------------------------------------------------------------------------------------------------------------------------------------|-------------------------------------------------------|-----------------------------------------------------------------------------------------------------------------------------------------------------------------------------------------------------------------------------------------------------------------------------------------------------------------------------------------------------------------|-------------------|
| 9 Rafanelli 2020<br>Italy<br>Two centers RCTs   | Patients who were hospitalized for a first episode of AMI or unstable angina with depressed and/or demoralized conditions. | 100 patients<br><br>Intervention<br>n=50<br><br>Control<br>n=50   | Intervention<br>n=62%<br><br>Control n=76%        | Intervention=5<br>7.64±9.99<br><br>Control<br>n=60.02±10.94 | The Structured Clinical Interview for Depression. | Intervention delivered by psychologist, 12 session (45m/session), a face to face individual and combination therapy, added Well being therapy intervention                                                        | Intervention: CBT+WBT<br>Control: Clinical management | Intervention group (The sequential combination of CBT/WBT)<br>Baseline: 7.92(4.77)<br>Post-test: 5.19(4.96)<br>3 mo: 6.38(5.03)<br>6 mo: 7.06(5.22)<br>12 mo: 6.91(5.08)<br>30 mo: 5.99(4.64)<br><br>UC(Clinical Management)<br>Baseline: 6.90(4.87)<br>Post-test: 5.94(4.22)<br>3 mo: 5.83(4.75)<br>6 mo: 6.80(5.45)<br>12 mo: 6.22(5.09)<br>30 mo: 5.83(4.18) | 100%              |
| 10 Humphries 2021<br>Sweden<br>Multicenter RCTs | Patients with recent AMI reporting mild-to-moderate symptoms of anxiety or depression.                                     | 239 patients<br><br>Intervention<br>n=117<br><br>Control<br>n=122 | Intervention<br>n=62.4%<br><br>Control<br>n=70.5% | Intervention<br>58.4±9<br><br>Control<br>60.8±7.8           | HADS                                              | Intervention delivered by therapist for 14 weeks, an internet and telephone-based therapy added.                                                                                                                  | Intervention: iCBT<br>Control: Usual care             | Intervention group:<br>Baseline: 9.9(2.2)<br>12 mo: 6.2(3.8)<br>Δ -3.7<br><br>UC:<br>Baseline: 10.3(2.5)<br>12 mo: 7.8(3.5)<br>Δ -2.5                                                                                                                                                                                                                           | 100%              |
| 11 Freedland 2009<br>USA<br>RCTs                | Patients aged 21 years or older who had undergone CABG surgery within the past year.                                       | Post CABG Patients<br>Intervention<br>n=41<br><br>Control<br>n=40 | Intervention<br>n=44%<br><br>Control<br>n=57%     | N/A                                                         | BDI II                                            | Intervention delivered by psychologist and social worker, 2 sessions (50-60m/session), A face to face but sometimes use phone call therapy. Antidepressant medication was allowed as long as the patient had been | Intervention: CBT<br>Control: Usual care              | Intervention group<br>Baseline=22.3(1.3)<br>3 mo= 5.4(1.3)<br>6 mo=7.8(1.3)<br>9 mo= 6.7(1.3)<br><br>UC<br>Baseline=20.8(1.4)<br>3 mo=13.8(1.4)<br>6 mo=10.7(1.4)<br>9 mo=12.9(1.4)<br><br>P between groups .02                                                                                                                                                 | 92%               |

| First Author; Year; Country; Study Design | Population                              | Sample                                                                               | Male (%)                                                   | Age (y)                              | Instruments                                  | Intervention                                   | Comparison                                                                                                                                                                                                                                                                                                                                                                                                        | Outcomes (Depression)                                                                                        | Appraisal Results                                                                                                                                                                      |      |
|-------------------------------------------|-----------------------------------------|--------------------------------------------------------------------------------------|------------------------------------------------------------|--------------------------------------|----------------------------------------------|------------------------------------------------|-------------------------------------------------------------------------------------------------------------------------------------------------------------------------------------------------------------------------------------------------------------------------------------------------------------------------------------------------------------------------------------------------------------------|--------------------------------------------------------------------------------------------------------------|----------------------------------------------------------------------------------------------------------------------------------------------------------------------------------------|------|
|                                           |                                         |                                                                                      |                                                            |                                      |                                              | taking a therapeutic dose for at least 6 weeks |                                                                                                                                                                                                                                                                                                                                                                                                                   |                                                                                                              |                                                                                                                                                                                        |      |
| 12                                        | Berkman 2003<br>USA<br>Multicenter RCTs | All patients with an acute MI admitted to the participating hospitals (73 hospitals) | CHD depressed Patients, Intervention n=1238 Control n=1243 | Intervention n=57% Control n=56%     | Intervention 61±12.6 Control= 61±12.5        | BDI II                                         | Intervention delivered by therapist, The maximum duration of intervention was 6 months. Group therapy could extend an additional 12 weeks and adjunctive pharmacotherapy for up to 12 months, at which time the patient was reevaluated by the ENRICHD psychiatrist, intervention group patient was initiated antidepressant (sertraline hydrochloride) 50mg/d and maximum 200mg/d as necessary, a mixed therapy. | Intervention: CBT+ antidepressant Control: Usual care                                                        | Intervention group: Baseline: 17.7(8.1) 6 mo: 9.1(8.6) Δ -8.6 (9.2)<br><br>U.C.: Baseline: 18.0(7.6) 6 mo: 12.2(9.1) Δ -5.8 (8.9)<br><br>CI -2.7 (-3.7 to -1.7) (P<.001)               | 85%  |
| 13                                        | Dao 2011<br>USA<br>RCTs                 | Patients pre-post operative (CABG) with symptoms of depression or anxiety            | Patients Pre-CABG. Intervention n=48 Control n =49         | Intervention n=77.1% Control n=79.6% | Intervention= 62.8 ±11.8 Control= 64.2 ±11.9 | BDI II                                         | Intervention delivered by therapist, 2 sessions before surgery and 2 sessions after surgery (1h/session), A face to face individual therapy. Antidepressant                                                                                                                                                                                                                                                       | Intervention: CBTwith MADES (Managing Anxiety and Depression using Education and Skills) Control: Usual care | Intervention group: Baseline: 23(6.6) Post-test (1): 15.9(5.1) Post-test (2) 1 mo: 19.2(6.7)<br><br>U.C.: Baseline: 22.4(6.2) Post-test (1): 23.4(11.6) Post-test (2) 1 mo: 22.5(10.7) | 100% |

| First Author; Year; Country; Study Design | Population                  | Sample                                                                                                                  | Male (%)                                                                                                                                           | Age (y)                                                | Instruments                                                  | Intervention                                                                                                                                                                                                                                                                        | Comparison                                                       | Outcomes (Depression)                                                                                                                                                                                             | Appraisal Results |
|-------------------------------------------|-----------------------------|-------------------------------------------------------------------------------------------------------------------------|----------------------------------------------------------------------------------------------------------------------------------------------------|--------------------------------------------------------|--------------------------------------------------------------|-------------------------------------------------------------------------------------------------------------------------------------------------------------------------------------------------------------------------------------------------------------------------------------|------------------------------------------------------------------|-------------------------------------------------------------------------------------------------------------------------------------------------------------------------------------------------------------------|-------------------|
|                                           |                             |                                                                                                                         |                                                                                                                                                    |                                                        |                                                              | medication was allowed as long as the patient had been taking a therapeutic dose for at least 6 weeks                                                                                                                                                                               |                                                                  |                                                                                                                                                                                                                   |                   |
| 14                                        | Nejati 2022<br>Iran<br>RCTs | Patients with CHD who were accepted to the private clinics of cardiologists of Mashhad (Iran) for coronary angiography. | CHD Patients.<br>CBGI-CHD<br>n=17<br><br>Cognitive Therapy in Groups (CTG) (CTG) of Type-D Personality<br>n=17<br><br>Control Group (C.G.)<br>n=17 | N/A                                                    | CBGI-CHD= 59±10.48<br><br>CTG= 57±9.17<br><br>CG=58±9.77     | BDI-II<br><br><br><br><br><br><br>Intervention delivered by psychologist and cardiologist, CBGI-CHD=12 session (2,5h/session) CTG 12=session (2h/session), A face to face group therapy                                                                                             | Intervention:<br>1. CBGI-CHD<br>2. CTG<br>Control:<br>Usual care | Intervention Group:<br>CBGI-CHD<br>Pre-test=21.46(5.74)<br>Post-test=18.88(5.26)<br><br>CTG<br>Pre-test=22.81(6.14)<br>Post-test= 18.54(5.46)<br><br>UC:<br>CG<br>Pre-test= 21.16(8.50)<br>Post-test= 20.17(5.87) | 75%               |
| 15                                        | Zetta 2011<br>Scotland      | Patients with anginal symptoms (cardiac disease, CHD)                                                                   | Intervention<br>n=103<br><br>control<br>n=102                                                                                                      | Male<br>Intervention:<br>n=72%<br><br>control<br>n=65% | Intervention:<br>64.8 (10.04)<br><br>Contol:<br>65.94 (9.96) | HADS<br><br><br><br><br><br><br>Intervention delivered by nurse, incorporated to existing rehabilitation services. During a 45 min in hospital consultation the A.P. nurse completed an assessment and initiated the A.P. intervention, which was then facilitated over the next 12 | Intervention:<br>CBT<br>Control:<br>Usual care                   | Intervention<br>Baseline: 2.07 (0.84)<br>6 mo: 2.00 (0.93)<br><br>Control<br>Baseline: 2.07 (0.79)<br>6 mo: 2.15 (0.86)                                                                                           | 75%               |

|    | First Author; Year;<br>Country; Study<br>Design | Population                                 | Sample                                      | Male (%)                                                   | Age (y)                                                        | Instru<br>ments    | Intervention                                                                                                                 | Comparison                                     | Outcomes<br>(Depression)                                                                                                                  | Appraisal<br>Results |
|----|-------------------------------------------------|--------------------------------------------|---------------------------------------------|------------------------------------------------------------|----------------------------------------------------------------|--------------------|------------------------------------------------------------------------------------------------------------------------------|------------------------------------------------|-------------------------------------------------------------------------------------------------------------------------------------------|----------------------|
|    |                                                 |                                            |                                             |                                                            |                                                                |                    | weeks, An<br>individual telephone<br>based therapy                                                                           |                                                |                                                                                                                                           |                      |
| 16 | Barth 2005<br>Germany<br>Multicenter RCTs       | CHD patients in<br>cardiac rehabilitation. | Intervention<br>n=27<br><br>control<br>n=28 | Male<br>Intervention:<br>n=81.5%<br><br>control<br>n=71.9% | Intervention:<br>60.81 (11.06)<br><br>Contol:<br>55.62 (10.05) | BDI<br>and<br>HADS | Intervention<br>delivered by<br>psychotherapist, 4-6<br>session<br>(50min/session), An<br>individual face to<br>face therapy | Intervention:<br>CBT<br>Control:<br>Usual care | Intervention, BDI score:Baseline:<br>19.04(6.39)<br>1 mo: 12.34(7.69)<br><br>U.C. BDI score:<br>Baseline: 21.25(5.43)<br>1 mo:15.29(7.65) | 72%                  |

**Notes:**

**Abbreviations:** HADS, Hospital Anxiety and Depression Scale; BDI-II, Beck Depression Inventory-II; PHQ-9, Patient Health Questionnaire-9; CDS, Cardiac Depression Scale; CABG, Coronary Artery Bypass Graft; AVR, Aorta Valve Replacement; MVR, Mitral Valve Repair/Replacement; CBGI-CHD, Cognitive-Behavioral Group Intervention for Coronary Heart Disease; CTG, Cognitive Therapy in Groups; iCBT, internet-based cognitive behavioral therapy; A.P, Angina Plan; PST, Problem-Solving Treatment.

Table S2. Search Strategy

| <b>PUBMED</b> |                                                                                                                                                                                                                                                                                                                                                                                                                                                                      |           |
|---------------|----------------------------------------------------------------------------------------------------------------------------------------------------------------------------------------------------------------------------------------------------------------------------------------------------------------------------------------------------------------------------------------------------------------------------------------------------------------------|-----------|
| #1            | coronary heart disease OR cardiac OR heart OR myocardial                                                                                                                                                                                                                                                                                                                                                                                                             | 2,249,813 |
| #2            | psychosocial intervention OR psychotherapy OR CBT OR cognitive behavior therapy                                                                                                                                                                                                                                                                                                                                                                                      | 306,202   |
| #3            | depressive OR depression                                                                                                                                                                                                                                                                                                                                                                                                                                             | 594,647   |
| #4            | experimental OR randomized trial                                                                                                                                                                                                                                                                                                                                                                                                                                     | 2,859,111 |
| #5            | (#1 AND #2 AND #3 AND #4)<br>(((coronary heart disease OR cardiac OR heart OR myocardial) AND (psychosocial intervention OR psychotherapy OR CBT OR cognitive behavior therapy)) AND (depressive OR depression)) AND (experimental OR randomized trial)                                                                                                                                                                                                              | 748       |
| <b>SCOPUS</b> |                                                                                                                                                                                                                                                                                                                                                                                                                                                                      |           |
| 1             | coronary heart disease OR cardiac OR heart OR myocardial                                                                                                                                                                                                                                                                                                                                                                                                             | 1,429,260 |
| 2             | TITLE-ABS-KEY ( psychosocial AND intervention OR psychotherapy OR cbt OR cognitive AND behavior AND therapy )                                                                                                                                                                                                                                                                                                                                                        | 8,361     |
| 3             | TITLE-ABS-KEY ( depressive OR depression )                                                                                                                                                                                                                                                                                                                                                                                                                           | 878,441   |
| 4             | TITLE-ABS-KEY ( experimental OR randomized AND trial )                                                                                                                                                                                                                                                                                                                                                                                                               | 1,168,810 |
| 5             | ( TITLE-ABS-KEY ( experimental OR randomized AND trial ) ) AND ( TITLE-ABS-KEY ( depressive OR depression ) ) AND ( TITLE-ABS-KEY ( psychosocial AND intervention OR psychotherapy OR cbt OR cognitive AND behavior AND therapy ) ) AND ( coronary AND heart AND disease OR cardiac OR heart OR myocardial )                                                                                                                                                         | 68        |
| <b>CINAHL</b> |                                                                                                                                                                                                                                                                                                                                                                                                                                                                      |           |
| S1            | "cardiac disease*" OR "cardiac disorder*" OR "heart disease*" OR "heart disorder*" OR "heart failure*" OR cardiac* OR myocardia "chronic disease*" OR "chronic* illness*" OR "coronary disease*" OR "myocardial ischemia*" OR "coronary syndrome"                                                                                                                                                                                                                    | 376,982   |
| S2            | MH(("Heart disease"+) OR (myocardium+) OR ("chronic disease"+) OR ("heart failure"+))                                                                                                                                                                                                                                                                                                                                                                                | 11,569    |
| S3            | S1 OR S2                                                                                                                                                                                                                                                                                                                                                                                                                                                             | 380,703   |
| S4            | psychosocial intervention OR psychotherapy OR CBT OR cognitive behavior therapy                                                                                                                                                                                                                                                                                                                                                                                      | 59,569    |
| S5            | MH(("psychosocial intervention"+) OR (psychotherapy +) OR ("CBT "+) OR ("cognitive behavior therapy "+))                                                                                                                                                                                                                                                                                                                                                             | 6,536     |
| S6            | S4 OR S5                                                                                                                                                                                                                                                                                                                                                                                                                                                             | 59,754    |
| S7            | "depressive disorder" OR depression OR "depressive symptoms"                                                                                                                                                                                                                                                                                                                                                                                                         | 207,897   |
| S8            | MH("depression"+)                                                                                                                                                                                                                                                                                                                                                                                                                                                    | 801       |
| S9            | S7 OR S8                                                                                                                                                                                                                                                                                                                                                                                                                                                             | 207,983   |
|               | S3 AND S6 AND S9                                                                                                                                                                                                                                                                                                                                                                                                                                                     | 463       |
| S10           | ((MH "Clinical Trials+") or (PT Clinical trial) or (TX clinic* n1 trial*) or TX ( (singl* n1 blind*) or (singl* n1 mask*) ) or TX ( (doubl* n1 blind*) or (doubl* n1 mask*) ) or TX ( (tripl* n1 blind*) or (tripl* n1 mask*) ) or TX ( (trebl* n1 blind*) or (trebl* n1 mask*) ) or (TX randomi* control* trial*) or (MH "Random Assignment") or (TX random* allocat*) or (TX placebo*) or (MH "Placebos") or (MH "Quantitative Studies") or (TX allocat* random*)) | 1,806,910 |
| S11           | S3 AND S6 AND S9 AND S10                                                                                                                                                                                                                                                                                                                                                                                                                                             | 272       |



|                                 |                                                                                                                                                                                                                                                                                                                                                                                                                                                                    |           |
|---------------------------------|--------------------------------------------------------------------------------------------------------------------------------------------------------------------------------------------------------------------------------------------------------------------------------------------------------------------------------------------------------------------------------------------------------------------------------------------------------------------|-----------|
| <b>ACADEMIC SEARCH COMPLETE</b> |                                                                                                                                                                                                                                                                                                                                                                                                                                                                    |           |
| S1                              | "cardiac disease*" OR "cardiac disorder*" OR "heart disease*" OR "heart disorder*" OR "heart failure*" OR cardiac* OR myocardia "chronic disease*" OR "chronic* illness*" OR "coronary disease*" OR "myocardial ischemia*" OR "coronary syndrome"                                                                                                                                                                                                                  | 638,528   |
| S2                              | MH(("Heart disease"+) OR (myocardium+) OR ("chronic disease"+) OR ("heart failure"+))                                                                                                                                                                                                                                                                                                                                                                              | 128,959   |
| S3                              | S1 OR S2                                                                                                                                                                                                                                                                                                                                                                                                                                                           | 644,774   |
| S4                              | "psychosocial intervention" OR psychotherapy OR CBT OR "cognitive behavior therapy"                                                                                                                                                                                                                                                                                                                                                                                | 157,427   |
| S5                              | MH(("psychosocial intervention"+) OR (psychotherapy +) OR ("CBT "+) OR ("cognitive behavior therapy "+))                                                                                                                                                                                                                                                                                                                                                           | 72,105    |
| S6                              | S4 OR S5                                                                                                                                                                                                                                                                                                                                                                                                                                                           | 157,427   |
| S7                              | "depressive disorder" OR depression OR "depressive symptoms"                                                                                                                                                                                                                                                                                                                                                                                                       | 344,215   |
| S8                              | MH("depression"+)                                                                                                                                                                                                                                                                                                                                                                                                                                                  | 185,875   |
| S9                              | S7 OR S8                                                                                                                                                                                                                                                                                                                                                                                                                                                           | 344,215   |
| S10                             | ((MH "Clinical Trials+") or (PT Clinical trial) or (TX clinic* n1 trial*) or TX (singl* n1 blind*) or (singl* n1 mask*) ) or TX ( (doubl* n1 blind*) or (doubl* n1 mask*) ) or TX ( (tripl* n1 blind*) or (tripl* n1 mask*) ) or TX ( (trebl* n1 blind*) or (trebl* n1 mask*) ) or (TX randomi* control* trial*) or (MH "Random Assignment") or (TX random* allocat*) or (TX placebo*) or (MH "Placebos") or (MH "Quantitative Studies") or (TX allocat* random*)) | 1,326,613 |
| S11                             | S3 AND S6 AND S9 AND S10                                                                                                                                                                                                                                                                                                                                                                                                                                           | 338       |
| <b>PSYCINFO</b>                 |                                                                                                                                                                                                                                                                                                                                                                                                                                                                    |           |
| 1                               | coronary heart disease.mp.                                                                                                                                                                                                                                                                                                                                                                                                                                         | 4,601     |
| 2                               | cardiac.mp.                                                                                                                                                                                                                                                                                                                                                                                                                                                        | 19,733    |
| 3                               | heart.mp. or exp Heart/                                                                                                                                                                                                                                                                                                                                                                                                                                            | 70,843    |
| 4                               | myocardial.mp.                                                                                                                                                                                                                                                                                                                                                                                                                                                     | 7,078     |
| 5                               | psychosocial intervention.mp.                                                                                                                                                                                                                                                                                                                                                                                                                                      | 2,574     |
| 6                               | psychotherapy.mp. or exp Psychotherapy/                                                                                                                                                                                                                                                                                                                                                                                                                            | 250,344   |
| 7                               | CBT.mp.                                                                                                                                                                                                                                                                                                                                                                                                                                                            | 16,831    |
| 8                               | cognitive behavior therapy.mp. or exp Cognitive Behavior Therapy/                                                                                                                                                                                                                                                                                                                                                                                                  | 28,186    |
| 9                               | depressive.mp.                                                                                                                                                                                                                                                                                                                                                                                                                                                     | 156,818   |
| 10                              | depression.mp.                                                                                                                                                                                                                                                                                                                                                                                                                                                     | 370,759   |
| 11                              | experimental.mp.                                                                                                                                                                                                                                                                                                                                                                                                                                                   | 223,260   |
| 12                              | randomized trial.mp.                                                                                                                                                                                                                                                                                                                                                                                                                                               | 6,850     |
| 13                              | 1 or 2 or 3 or 4                                                                                                                                                                                                                                                                                                                                                                                                                                                   | 80,811    |
| 14                              | 5 or 6 or 7 or 8                                                                                                                                                                                                                                                                                                                                                                                                                                                   | 273,929   |
| 15                              | 9 or 10                                                                                                                                                                                                                                                                                                                                                                                                                                                            | 397,646   |
| 16                              | 11 or 12                                                                                                                                                                                                                                                                                                                                                                                                                                                           | 229,577   |
| 17                              | 13 and 14 and 15 and 16                                                                                                                                                                                                                                                                                                                                                                                                                                            | 52        |
| <b>Google Scholar</b>           |                                                                                                                                                                                                                                                                                                                                                                                                                                                                    |           |
| 1                               | (coronary heart disease OR cardiac OR heart OR myocardial) AND (psychosocial intervention OR psychotherapy OR CBT OR cognitive behavior therapy) AND (depressive OR depression) AND (experimental OR randomized trial)                                                                                                                                                                                                                                             | 64,100    |
| 2                               | The first 100 articles were taken based on relevance                                                                                                                                                                                                                                                                                                                                                                                                               | 100       |

**Figure S1.** The forest plot of the sensitivity analysis of included studies when low risk of bias studies excluded

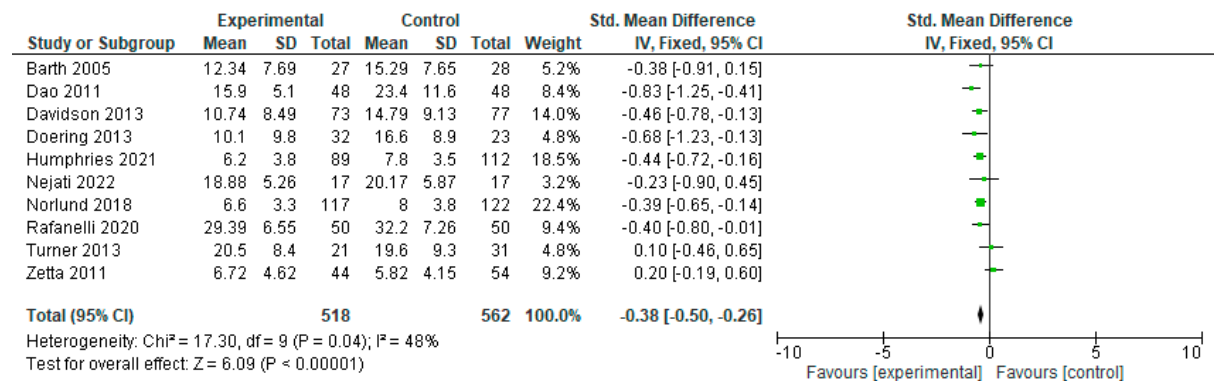

**Figure S2.** The forest plot of the sensitivity analysis of included studies when high risk of bias studies excluded

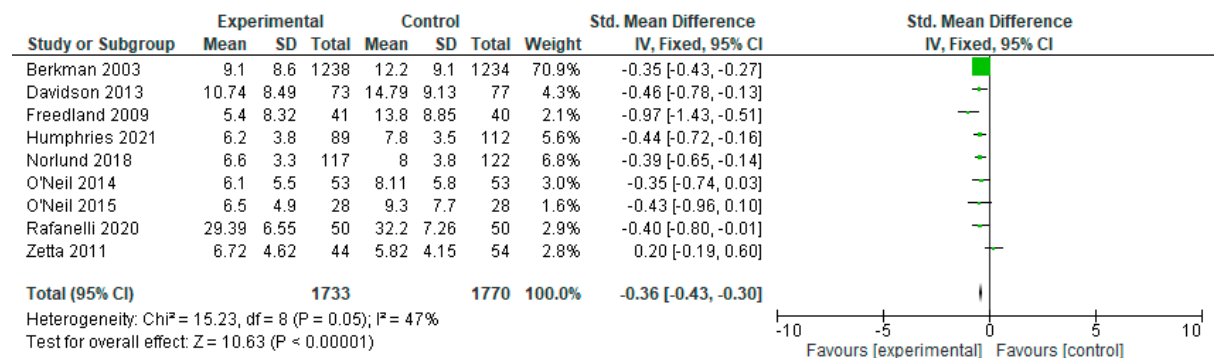

**Figure S3.** The forest plot of included studies with outlier

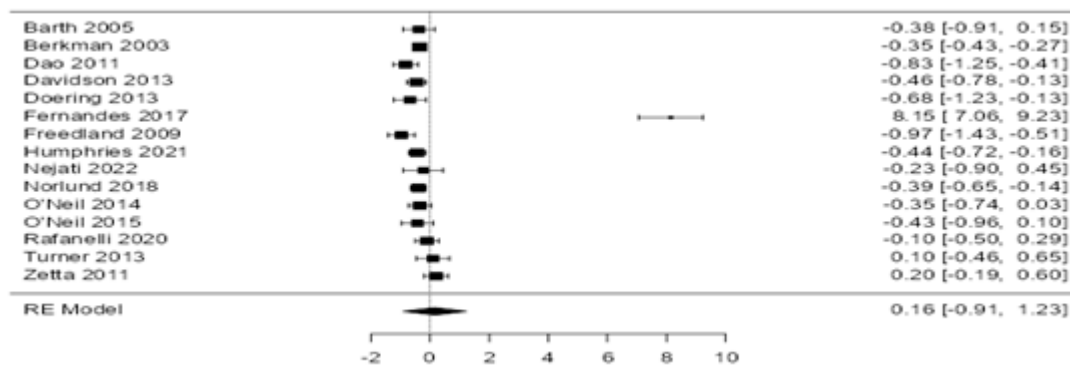

**Figure S4.** The funnel plot of included studies with outlier

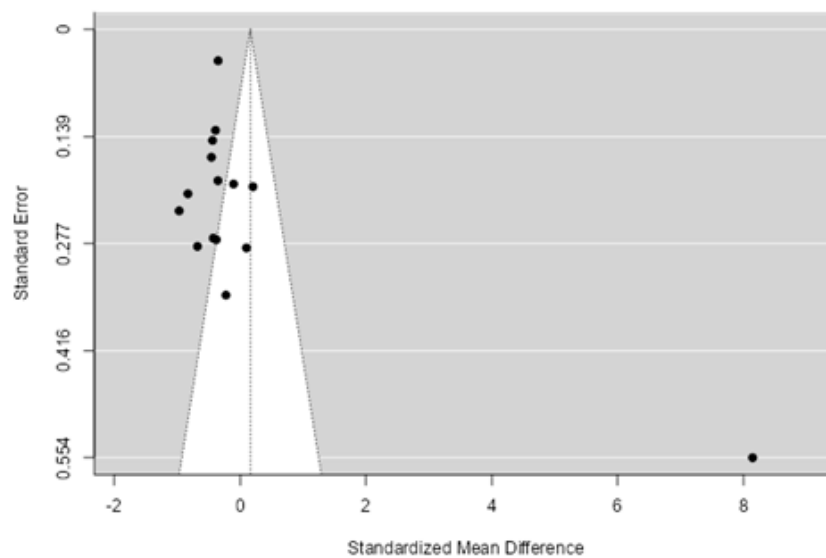

**Figure S5.** Effect of CBT Based on Short-Term Follow-Up ( $\leq 3$  months).

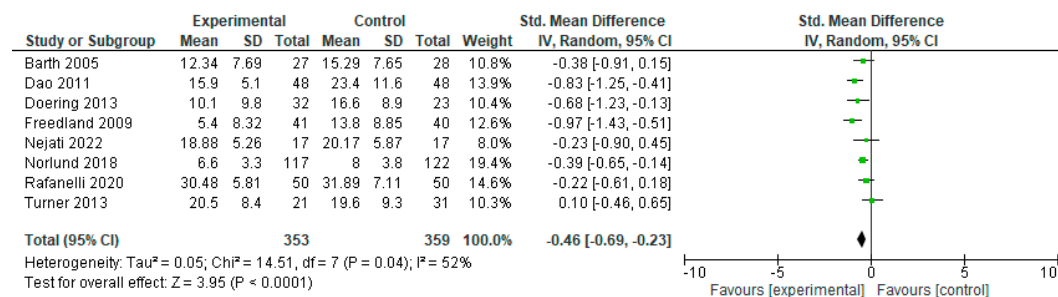

**Figure S6.** Effect of CBT based on Middle-Term Follow-Up (post-6 months intervention).

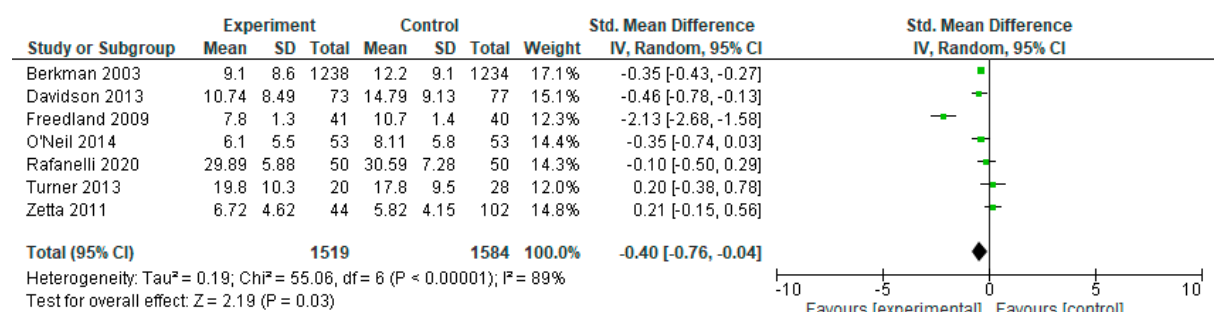

**Figure S7.** Effect of CBT Based on Long-Term Follow-Up ( $\geq 12$  months).

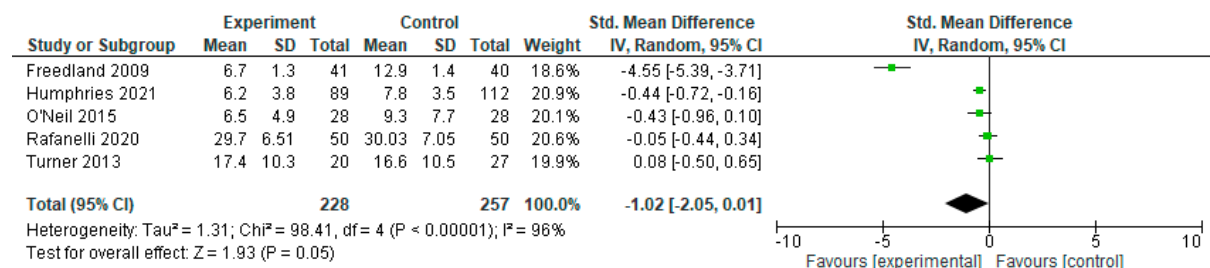

**Figure S8.** Effect of CBT Based on Face-to-Face Delivery Mode.

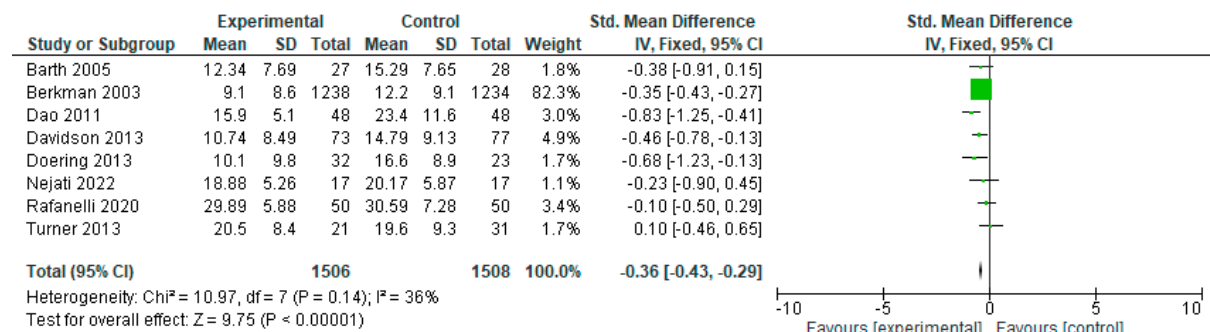

**Figure S9.** Effect of CBT Based on Remote (By Phone or Internet) Delivery Mode.

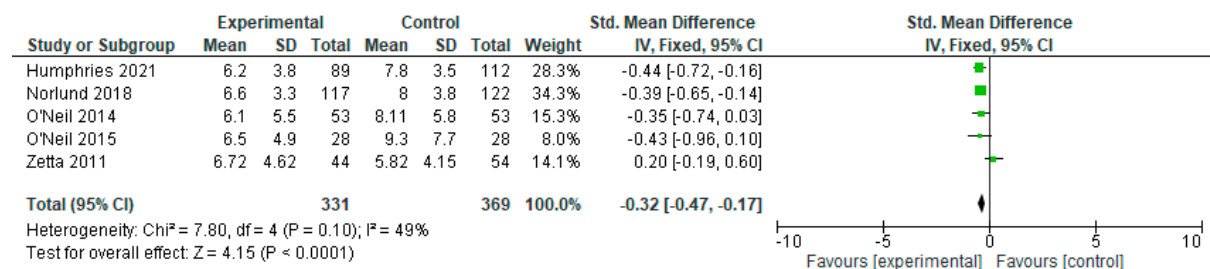

**Figure S10.** Effect of CBT Based on Internet Delivery Mode.

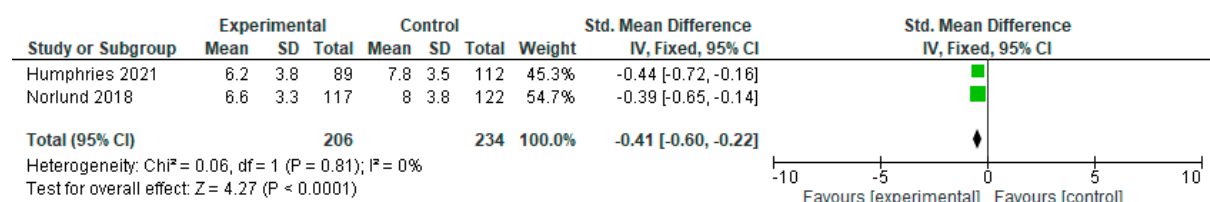

**Figure S11.** Effect of CBT Based on The Low Frequency of Meetings (3 – 6 Session).

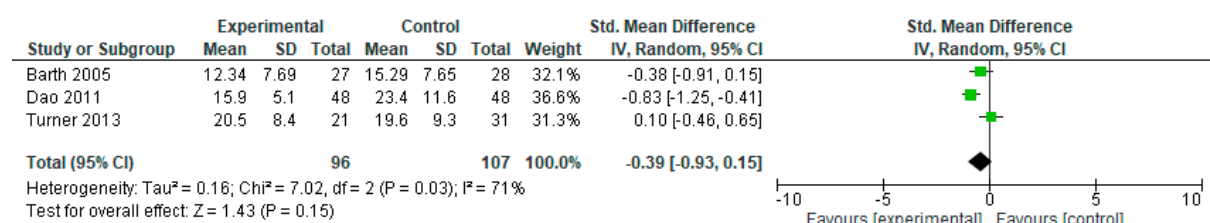

**Figure S12.** Effect of CBT Based on The Medium Frequency of Meetings (8 – 12 Sessions).

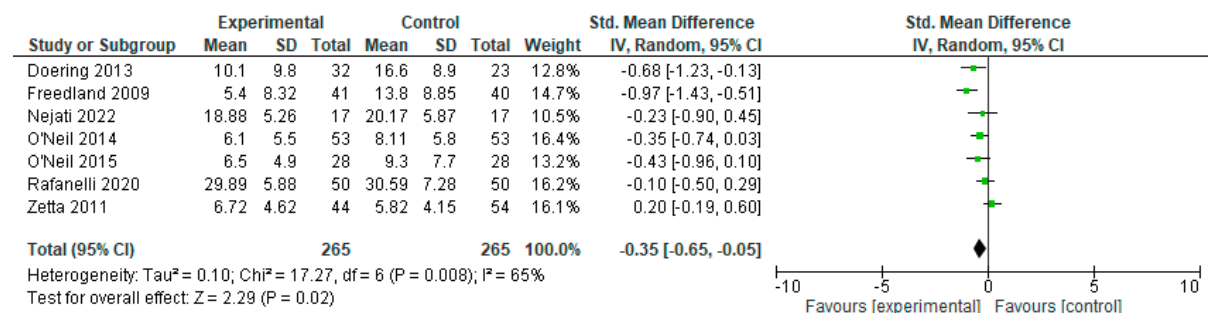

**Figure S13.** Effect of CBT Based on Frequent Meetings ( $\geq 13$  Sessions).

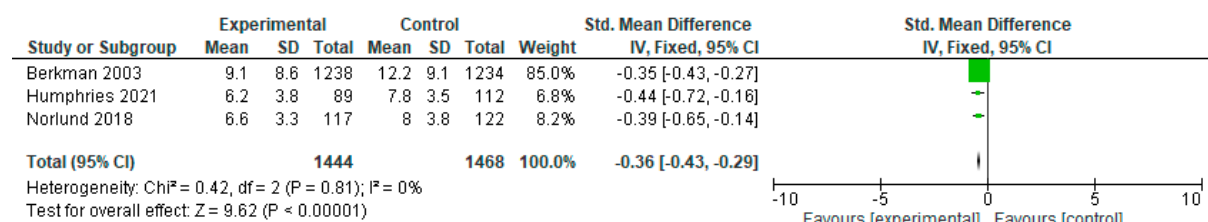

**Figure S14.** Effect of CBT Based on Individual Delivery Mode

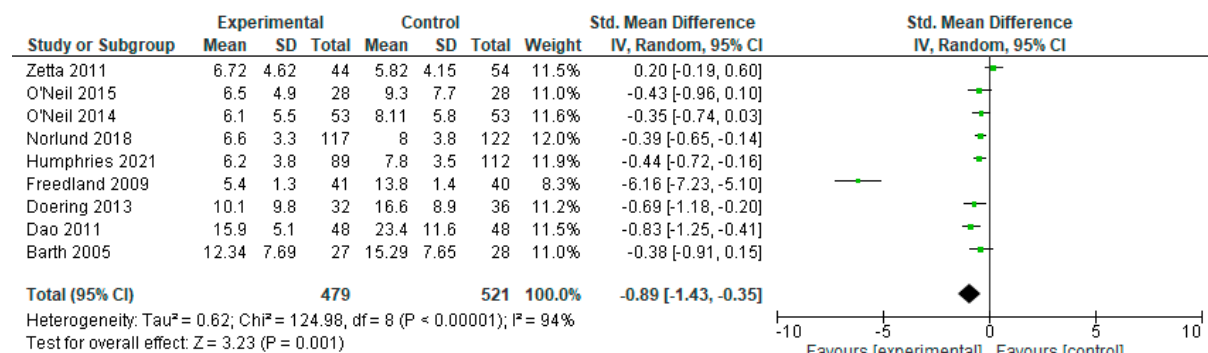

**Figure S15.** Effect of CBT Based on Mixed (Group and Individual) Delivery Mode.

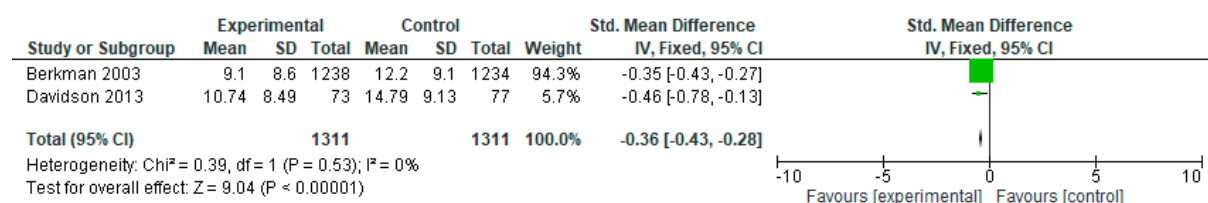

**Figure S16.** Effect of CBT based on Individual Delivery Mode After Two Studies with CABG Patients was Issued.

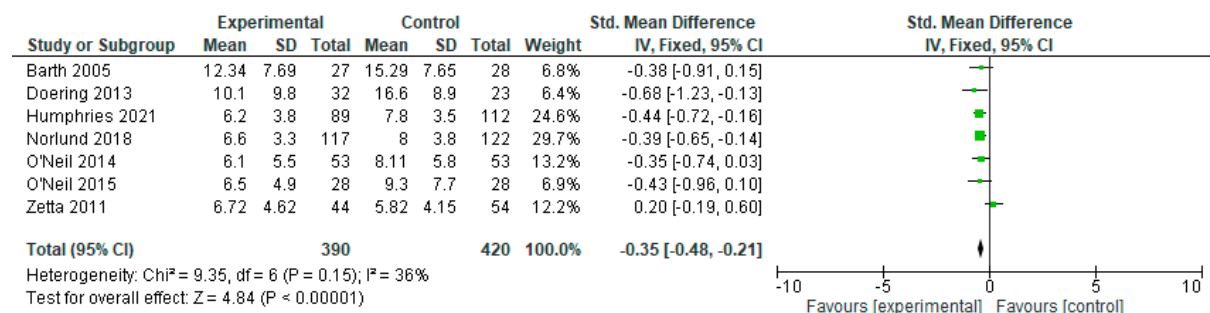

**Figure S17.** Effect of CBT Based on Group Delivery Mode.

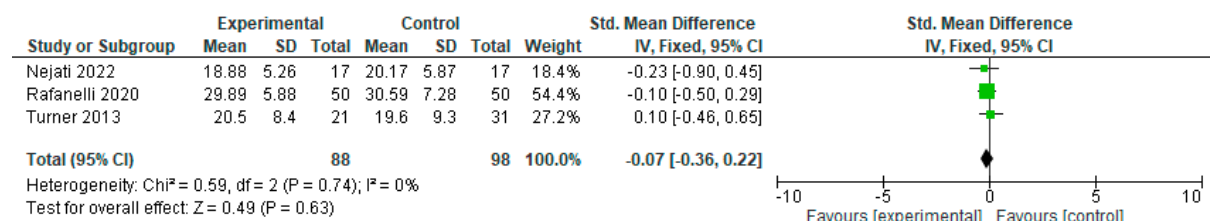

**Figure S18.** Effect of CBT without Combination.

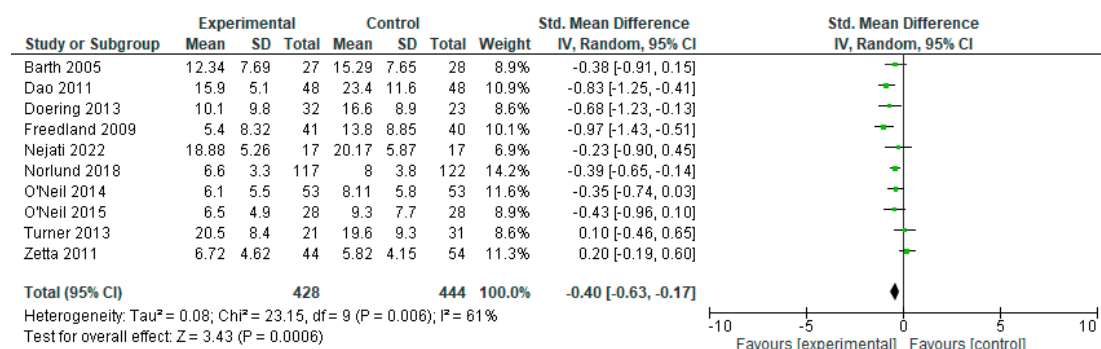

**Figure S19.** Effect of CBT Combined with other Therapy.

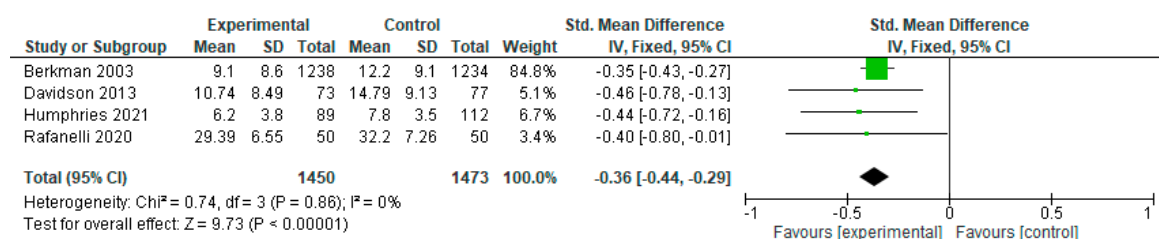

**Figure S20.** Effect of CBT on Patients with CABG.

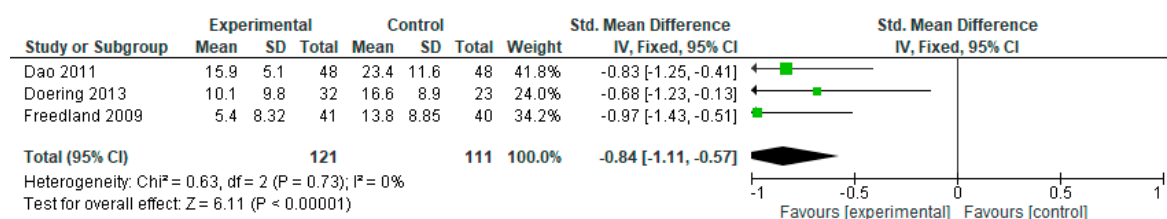

Figure S21. Effect of CBT on Patients with Various Treatments

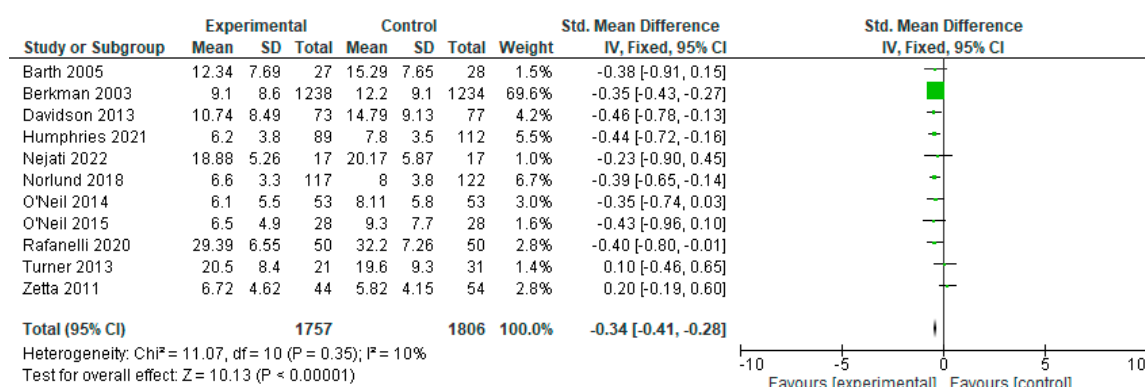

Supplement: s1 [file s1]
